# Supplementary material for: The Association Between Weight-Adjusted Waist Index and Successful Aging Among China Older Adults
Source: Research Square preprint supplement (doi:10.21203/rs.3.rs-6439202/v1), 2025-05-19
Supplement: Supplementary file 1 [file 48b9f422b55efba1cc88f224.xlsx]

## Sheet: Table 1
	Table 1. The characteristics of study participants, expressed as n (%).
	Characteristics	Aging Categories
		Non-successful aging (n=2733)	Successful aging (n=1487)	p-value
	Gender			<0.001
	Male	1172 (42.88%)	743 (49.97%)
	Female	1561 (57.12%)	744 (50.03%)
	Age (years)			<0.001
	60-64	849 (31.06%)	608 (40.89%)
	65-69	773 (28.28%)	409 (27.51%)
	70-74	543 (19.87%)	274 (18.43%)
	≥75	568 (20.78%)	196 (13.18%)
	Education level			<0.001
	Illiteracy	542 (19.83%)	143 (9.62%)
	primary school	1494 (54.67%)	672 (45.19%)
	Middle school	493 (18.04%)	418 (28.11%)
	≥high school	204 (7.46%)	254 (17.08%)
	Marital status			<0.001
	Married/cohabiting	2040 (74.64%)	1198 (80.56%)
	Widowed	575 (21.04%)	227 (15.27%)
	Divorced/never married/others	118 (4.32%)	62 (4.17%)
	Residence			<0.001
	Rural	2295 (83.97%)	1071 (72.02%)
	Urban	438 (16.03%)	416 (27.98%)
	Drinking frequency			<0.001
	>1/month	551 (20.16%)	383 (25.76%)
	≤1/month	163 (5.96%)	128 (8.61%)
	Never drank	2019 (73.87%)	976 (65.64%)
	Smoking status			0.016
	Current smokers	670 (24.52%)	422 (28.38%)
	Fomer smokers	455 (16.65%)	220 (14.79%)
	Never smoked	1608 (58.84%)	845 (56.83%)
	Sleep duration (hours)			<0.001
	<6	1121 (41.02%)	442 (29.72%)
	6-8	1324 (48.44%)	896 (60.26%)
	≥8	288 (10.54%)	149 (10.02%)

## Sheet: Table 2
	Table 2. Association between WWI and successful aging and its specific dimensions in total sample.
	Successful aging	Weight-adjusted waist index, OR (95 % CI)
		Q1(7.34-10.86) n=1055	Q2 (10.86-11.40) n=1055	Q3 (11.40-12.01) n=1055	Q4 (12.01-15.88) n=1055	P for trend
	Successful aging
	Non adjusted model	1.00 (Reference)	0.86 (0.72, 1.02)	0.88 (0.74, 1.05)	0.58 (0.48, 0.69)***	<0.001
	Adjusted model	1.00 (Reference)	0.84 (0.70, 1.00)	0.95 (0.80, 1.14)	0.73 (0.60, 0.89)***	0.009
	Absence of major diseases
	Non adjusted model	1.00 (Reference)	0.84 (0.70, 1.01)	0.77 (0.64, 0.92)***	0.80 (0.66, 0.96)***	0.004
	Adjusted model	1.00 (Reference)	0.84 (0.71, 1.00)	0.76 (0.63, 0.91)***	0.77 (0.63, 0.94)*	0.002
	Freedom from disability
	Non adjusted model	1.00 (Reference)	0.71 (0.59, 0.85)***	0.68 (0.57, 0.80)***	0.48 (0.40, 0.57)***	<0.001
	Adjusted model	1.00 (Reference)	0.68 (0.56, 0.82)***	0.66 (0.55, 0.80)***	0.50 (0.40, 0.61)***	<0.001
	High cognitive function
	Non adjusted model	1.00 (Reference)	0.88 (0.74, 1.05)	0.81 (0.68, 0.97)*	0.53 (0.45, 0.63)***	<0.001
	Adjusted model	1.00 (Reference)	0.89 (0.75, 1.06)	0.93 (0.78, 1.11)	0.83 (0.69, 1.01)	0.113
	Good psychological status
	Non adjusted model	1.00 (Reference)	1.00 (0.85, 1.19)	0.95 (0.80, 1.12)	0.85 (0.71, 1.01)	0.04
	Adjusted model	1.00 (Reference)	0.99 (0.84, 1.17)	0.99 (0.84, 1.17)	1.02 (0.85, 1.23)	0.686
	Active social engagement
	Non adjusted model	1.00 (Reference)	1.07 (0.90, 1.26)	1.12 (0.95, 1.33)	0.93 (0.78, 1.09)	0.51
	Adjusted model	1.00 (Reference)	1.03 (0.87, 1.22)	1.10 (0.92, 1.31)	0.88 (0.72, 1.07)	0.332
	WWI was converted from a continuous variable to a categorical variable (quartile); Non adjusted model : adjusted for covariates, Adjusted model: adjusted for gender, age, education level, marital status,residence, drinking frequency, smoking status, and sleey duration; *p < 0.05; **p < 0.01; ***p < 0.001 indicate significance compared to Q1,calculated by the weighted Chi-square test; P for trend …

## Sheet: Table 3
	Table 3. Comparison of WWI, BMI, and WC in relation to successful aging
	Exposure	Successful aging, OR (95 % CI)
		Non adjusted model	Adjusted model
	WWI(cm/√kg)	0.81 (0.76, 0.86)	0.89 (0.82, 0.96)***
	WWI quartile
	Q1 (7.34 - 10.8, n=1055)	1.00 (Reference)	1.00 (Reference)
	Q2 (10.86 - 11.40, n=1055)	0.86 (0.72, 1.02)	0.84 (0.70, 1.00)
	Q3 (11.40 - 12.01, n=1055)	0.88 (0.74, 1.05)	0.95 (0.79, 1.15)
	Q4 (12.01 - 15.88, n=1055)	0.58 (0.48, 0.69)***	0.73 (0.59, 0.90)***
	P for trend	<0.001	0.012
	BMI (kg/m2)	1.03 (1.01, 1.05)	1.01 (0.99, 1.03)
	BMI quartile
	Q1 (13.06 - 20.74, n=1055)	1.00 (Reference)	1.00 (Reference)
	Q2 (20.74 - 23.21, n=1055)	1.31 (1.10, 1.57)*	1.22 (1.03, 1.45)*
	Q3 (23.21 - 25.80, n=1055)	1.39 (1.17, 1.64)***	1.17 (0.99, 1.39)
	Q4 (25.80 - 36.55, n=1055)	1.31 (1.11, 1.56)**	1.08 (0.89, 1.31)
	P for trend	0.003	0.801
	WC (cm)	1.01 (1.00, 1.01)	1.00 (0.99, 1.00)
	WC quartile
	Q1 (56.60 - 79.00, n=1097)	1.00 (Reference)	1.00 (Reference)
	Q2 (79.00 - 86.00, n=1026)	1.15 (0.96, 1.38)	1.12 (0.92, 1.36)
	Q3 (86.00 - 93.50, n=1048)	1.34 (1.14, 1.58)***	1.19 (0.99, 1.44)
	Q4 (93.50 - 116.30, n=1049)	1.21 (1.03, 1.43)*	1.04 (0.86, 1.26)
	P for trend	0.009	0.724
	Non adjusted model : unadjusted for covariates. Adjusted model: adjusted for sex, age, education level, marital status, residence, drinking frequency, smoking status, and sleep duration.*p < 0.05; **p < 0.01; ***p < 0.001 indicate significance compared to Q1,calculated by the weighted Chi-square test;

## Sheet: Table 4
	Table 4. Subgroup-specific associations and interaction tests between WWI and successful aging
	Characteristics	OR (95 % CI)	P	P for interaction
	Gender			0.906
	Male	0.92 (0.84, 1.00)	0.050
	Female	0.86 (0.79, 0.93)	＜0.001
	Age (years)			0.310
	60-64	0.95 (0.86, 1.05)	0.309
	65-69	0.79 (0.70, 0.88)	＜0.001
	70-74	0.90 (0.81, 0.99)	0.037
	≥75	0.81 (0.72, 0.91)	＜0.001
	Education level			0.767
	Illiteracy	0.85 (0.74, 0.98)	0.025
	primary school	0.95 (0.87, 1.04)	0.280
	Middle school	0.89 (0.80, 0.99)	0.030
	≥high school	0.98 (0.86, 1.12)	0.731
	Marital status			0.965
	Married/cohabiting	0.91 (0.84, 0.98)	0.014
	Widowed	0.83 (0.73, 0.93)	0.002
	Divorced/never married/others	0.99 (0.83, 1.18)	0.896
	Residence			0.732
	Rural	0.92 (0.85, 0.99)	0.033
	Urban	0.85 (0.76, 0.96)	0.010
	Drinking frequency			0.394
	>1/month	0.94 (0.84, 1.05)	0.286
	≤1/month	1.04 (0.89, 1.22)	0.618
	Never drank	0.85 (0.78, 0.92)	＜0.001
	Smoking status			0.161
	Current smokers	0.90 (0.82, 0.98)	0.015
	Fomer smokers	0.91 (0.81, 1.01)	0.081
	Never smoked	0.92 (0.82, 1.04)	0.186
	Sleep duration (hours)			0.207
	<6	0.91 (0.82, 1.00)	0.050
	6-8	0.89 (0.81, 0.98)	0.012
	≥8	0.94 (0.82, 1.07)	0.354
	P indicate within-subgroup trends; P for interaction tests subgroup differences.
